# Supplementary material
Source: ML conference proceedings conference paper supplement (https://openreview.net/forum?id=BGvkwZEGt7)
Supplement: supplementary_material [file attachment]

## 477 A Proofs

### 478 A.1 Direct direction

479 **Assumption A.1.** (Assumption 2.1) Assume that  $P_M(X) = P(X)$ , and  $P_M^d(Y|\theta, X) \propto P(Y|\theta, X)$   
 480 for  $X \rightarrow Y \leftarrow \theta$ .

481 **Proposition A.2.** (Proposition 2.2) If task  $d$  follows the  $X \rightarrow Y \leftarrow \theta$  direction,  $\arg \max_{y \in \mathcal{Y}} P_M^d(Y =$   
 482  $y|\theta^d, X)$  is the Bayes optimal classifier.

483 *Proof.* Since the data generation of the task  $d$  can be written as  $Y = f(X, \theta^d, \epsilon)$ , we have

$$P^d(Y|X) = P(Y|\theta^d, X).$$

484 And by Assumption A.1, we have

$$\arg \max_{y \in \mathcal{Y}} P_M^d(Y = y|\theta^d, X) = \arg \max_{y \in \mathcal{Y}} P(Y = y|\theta^d, X).$$

485 Thus  $\arg \max_{y \in \mathcal{Y}} P_M^d(Y = y|\theta^d, X)$  is the Bayes optimal classifier.  $\square$

486 **Theorem A.3.** (Theorem 2.3) If task  $d$  follows the  $X \rightarrow Y \leftarrow \theta$  direction, then the in-context learning  
 487 classifier

$$\arg \max_{y \in \mathcal{Y}} P_M^d(Y = y|X_1^d, Y_1^d, \dots, X_k^d, Y_k^d, X)$$

488 always has a higher or equal probability of misclassification to the Bayes optimal classifier  
 489  $\arg \max_{y \in \mathcal{Y}} P_M^d(Y = y|\theta^d, X)$ . Equality only takes when

$$\forall x \in \mathcal{X}, P_M^d(\theta^d|X_1^d, Y_1^d, \dots, X_k^d, Y_k^d, X = x) = 1.$$

490 *Proof.* Recall that in Equation (1), we have

$$P_M^d(Y|X_1^d, Y_1^d, \dots, X_k^d, Y_k^d, X) = \int_{\Theta} P_M^d(Y|\theta, X) P_M^d(\theta|X_1^d, Y_1^d, \dots, X_k^d, Y_k^d, X) d\theta.$$

491 By Proposition A.2,  $\arg \max_{y \in \mathcal{Y}} P_M^d(Y = y|\theta^d, X)$  is the Bayes optimal classifier. Let  $C_\theta(X) =$   
 492  $\arg \max_{y \in \mathcal{Y}} P_M^d(Y = y|\theta, X)$ , then the risk is defined as the probability of misclassification

$$R(C_\theta) = P(C_\theta(X) \neq Y) = \mathbb{E}_{XY}[\mathbb{1}_{C_\theta(X) \neq Y}].$$

493 Denote the in-context learning classifier  $\arg \max_{y \in \mathcal{Y}} P_M^d(Y = y|X_1^d, Y_1^d, \dots, X_k^d, Y_k^d, X)$  by  $C_k(X)$ .  
 494 We then have

$$R(C_k) = \mathbb{E}_{XY}[\mathbb{1}_{C_k(X) \neq Y}] = \mathbb{E}_X[\sum_{y \in \mathcal{Y}} (1 - P_M^d(Y = y|\theta^d, X)) \mathbb{1}_{C_k(X) = y}].$$

495 Such risk is minimized if and only if  $C_k(X) = C_{\theta^d}(X)$ , which only holds when  
 496  $P_M^d(\theta^d|X_1^d, Y_1^d, \dots, X_k^d, Y_k^d, X = x) = 1$  for all  $x \in \mathcal{X}$ .  $\square$

### 497 A.2 Channel direction

498 **Assumption A.4.** Assume that  $P_M(X) = P(X)$ , and  $P_M^d(X|\theta, Y) \propto P(X|\theta, Y)$  for the  $Y \rightarrow$   
 499  $X \leftarrow \theta$  direction.

500 **Proposition A.5.** If task  $d$  follows the  $Y \rightarrow X \leftarrow \theta$  causal direction,  $\arg \max_{y \in \mathcal{Y}} P_M^d(X|\theta^d, Y = y)$   
 501 is the Bayes optimal classifier when the label assignment is balanced.

502 *Proof.* Since the data generation of the task  $d$  can be written as  $X = g(Y, \theta^d, \epsilon)$ , we have

$$P^d(X|Y) = P(X|\theta^d, Y)$$

503 When the label is balanced, i.e.  $P^d(Y) = \frac{1}{|\mathcal{Y}|}$ , we have

$$P^d(Y|X) = \frac{P^d(X|Y)P^d(Y)}{P(X)} \propto P^d(X|Y)$$

504 And by Assumption A.4, we have

$$\arg \max_{y \in \mathcal{Y}} P_M^d(X|\theta^d, Y = y) = \arg \max_{y \in \mathcal{Y}} P(X|\theta^d, Y = y).$$

505 Thus  $\arg \max_{y \in \mathcal{Y}} P_M^d(X|\theta^d, Y = y) = \arg \max_{y \in \mathcal{Y}} P^d(Y = y|X)$  is the Bayes optimal classifier.  
506  $\square$

507 **Theorem A.6.** *If task  $d$  follows the  $Y \rightarrow X \leftarrow \theta$  direction, then the in-context learning classifier*

$$\arg \max_{y \in \mathcal{Y}} P_M^d(X|Y_1^d, X_1^d, \dots, Y_k^d, X_k^d, Y = y)$$

508 *always has a higher or equal probability of misclassification to the Bayes optimal classifier*  
509  *$\arg \max_{y \in \mathcal{Y}} P_M^d(X|\theta^d, Y = y)$ . Equality only takes when*

$$\forall y \in \mathcal{Y}, P_M^d(\theta^d|Y_1^d, X_1^d, \dots, Y_k^d, X_k^d, Y = y) = 1.$$

510 *Proof.* This theorem can be proved similarly as Theorem A.3. Recall that in Equation (2), we have

$$P_M^d(X|Y_1^d, X_1^d, \dots, Y_k^d, X_k^d, Y) = \int_{\Theta} P_M^d(X|\theta, Y) P_M^d(\theta|Y_1^d, X_1^d, \dots, Y_k^d, X_k^d, Y) d\theta.$$

511 By Proposition A.5,  $\arg \max_{y \in \mathcal{Y}} P_M^d(X|\theta^d, Y = y)$  is the Bayes optimal classifier. Let  $C_\theta(X) =$   
512  $\arg \max_{y \in \mathcal{Y}} P_M^d(X|\theta, Y = y)$ , then the risk is defined as the probability of misclassification

$$R(C_\theta) = P(C_\theta(X) \neq Y) = \mathbb{E}_{XY}[\mathbb{1}_{C_\theta(X) \neq Y}].$$

513 Denote the in-context learning classifier  $\arg \max_{y \in \mathcal{Y}} P_M^d(X|Y_1^d, X_1^d, \dots, Y_k^d, X_k^d, Y = y)$  by  $C_k(X)$ .  
514 We then have

$$R(C_k) = \mathbb{E}_{XY}[\mathbb{1}_{C_k(X) \neq Y}] = \mathbb{E}_X[\sum_{y \in \mathcal{Y}} (1 - P_M^d(X|\theta^d, Y = y)) \mathbb{1}_{C_k(X)=y}].$$

515 Such risk is minimized if and only if  $C_k(X) = C_{\theta^d}(X)$ , which only holds when  
516  $P_M^d(\theta^d|Y_1^d, X_1^d, \dots, Y_k^d, X_k^d, Y = y) = 1$  for all  $y \in \mathcal{Y}$ .  $\square$

### 517 A.3 Method

518 **Proposition A.7.** *(Proposition 3.1) When  $\mathcal{L}(\hat{\theta}^d)$  is minimized,  $P_M^d(Y|\hat{\theta}^d, X) = P(Y|\theta^d, X)$  for*  
519  *$X \rightarrow Y \leftarrow \theta$ , and  $P_M^d(X|\hat{\theta}^d, Y) = P(X|\theta^d, Y)$  for  $Y \rightarrow X \leftarrow \theta$ . If the LLM  $M$  is invertible, then*  
520  *$\hat{\theta}^d = \theta^d$ .  $\square$*

521 *Proof.* The proof of this proposition is straightforward.

522 Since

$$\mathcal{L}(\hat{\theta}^d) = H(P(Y|\theta^d, X)) + KL(P(Y|\theta^d, X) || P_M^d(Y|\hat{\theta}^d, X))$$

523 when  $\mathcal{L}(\hat{\theta}^d)$  is minimized, we have  $P_M^d(Y|\hat{\theta}^d, X) = P(Y|\theta^d, X)$  for  $X \rightarrow Y \leftarrow \theta$ , and  
524  $P_M^d(X|\hat{\theta}^d, Y) = P(X|\theta^d, Y)$  for  $Y \rightarrow X \leftarrow \theta$ .

525 If  $M$  is invertible, since the embedding matrix is invertible with or without new concept tokens,  
526  $P_M^d(Y|\hat{\theta}, X) = P_M^d(Y|\hat{\theta}', X)$  implies that  $\hat{\theta} = \hat{\theta}'$ . Thus  $\theta$  is identifiable, which means  $\hat{\theta}^d = \theta^d$ .  $\square$

Table 1: Prompt template and label mapping for the datasets we use. Since almost all sentences from ETHOS contain offensive content, we mask out the key offensive words in the examples below.

| Dataset  | Prompt                                                                                                                                  | Label Mapping                                                                                                                                                         |
|----------|-----------------------------------------------------------------------------------------------------------------------------------------|-----------------------------------------------------------------------------------------------------------------------------------------------------------------------|
| SST-2    | sentence: well worth revisiting as many times<br>positive                                                                               | negative/positive                                                                                                                                                     |
| FPB      | The company anticipates its turnover for the whole 2010 to surpass that of the previous year when it was EUR 67.1 million .<br>positive | negative/neutral/positive                                                                                                                                             |
| COLA     | It is this hat that I know the boy who is wearing.<br>unacceptable                                                                      | acceptable/unacceptable                                                                                                                                               |
| DBPedia  | The Nucet River is a tributary of the Chiojdeanca River in Romania.<br>NaturalPlace                                                     | Album/Animal/Artist/<br>Athlete/Building/Company/<br>EducationalInstitution/Film/<br>MeanOfTransportation/<br>NaturalPlace/OfficeHolder/<br>Plant/Village/WrittenWork |
| EmoC     | fast i mean fastingis a way of skipping meals i mena<br>you move on too fast<br>others                                                  | angry/happy/others/sad                                                                                                                                                |
| EmoS     | i feel this place was tragic<br>sadness                                                                                                 | anger/fear/joy/love/<br>sadness/surprise                                                                                                                              |
| ETHOS-SO | [Masked] should be removed from the face of the earth<br>true                                                                           | false/true                                                                                                                                                            |
| ETHOS-R  | I hate being a [Masked], wish I was a [Masked]<br>and no [Masked] on earth existed<br>false                                             | false/true                                                                                                                                                            |

## B Experiments

**Dateset.** In Table 1, we show how we process the text classification datasets into prompts. For each dataset, we take at most 16384 examples from the training set for training, and uniformly sample at most 1000 examples from the test set to test the in-context learning performance. In Table 2, we show the train size and test size we used for each dataset. We also list the set of diverse tasks trained with each dataset, which are denoted by their name in Huggingface datasets.<sup>7</sup> The license for SST2, ETHOS-SO and ETHOS-R is GNU General Public License v3. FPB is under a Creative Commons Attribution-NonCommercial-ShareAlike 3.0 Unported License. Note that these two datasets are hate speech detection datasets for different kinds of hate speech and contain many offensive texts. COLA is excerpted from the published works available on the website, and the copyright (where applicable) remains with the original authors or publishers. DBpedia is under a Creative Commons Attribution-ShareAlike License and the GNU Free Documentation License. EmoC and EmoS should be used for educational and research purposes only.

**Experiment details.** We run our experiments on A100, V100, and A6000 GPUs. We adopt a large portion of the code from the MetaICL repository [20]<sup>8</sup>. The training takes around 20 to 40 hours on a single GPU. We use a learning rate of 1e-4 and a batch size of 16, and train for 10k steps in total.

**Main results.** In Table 3, we list the detailed results of our method and baselines with different LLMs on different datasets in Figure 2.

**Causal direction results.** The detailed results with anti-causal direction (the opposite direction to what we described in Section 4 are in Table 6) are shown in Table 6, corresponding to Figure 6 in the main text.

**Other LLMs results.** The detailed results with other LLMs are shown in Table 5, corresponding to Figure 3a in the main text.

**Random token results.** The detailed results with random tokens are shown in Table 4, corresponding to Figure 3b in the main text.

<sup>7</sup><https://huggingface.co/docs/datasets/index>

<sup>8</sup><https://github.com/facebookresearch/MetaICL>

| dataset $d$                         | train size | test size | task set $\mathcal{S}$                                                                                                                                                                    |
|-------------------------------------|------------|-----------|-------------------------------------------------------------------------------------------------------------------------------------------------------------------------------------------|
| SST2 (glue-sst2)                    | 16384      | 1000      | glue-cola/glue-mnli/glue-qqp/<br>glue-mrpc/glue-qnli/glue-rte/glue-sst2/glue-wnli                                                                                                         |
| FPB (financial_phrasebank)          | 1811       | 453       | glue-sst2/glue-mnli/math_qa/sciq/<br>social_i_qa/wino_grande/glue-qqp/<br>ag_news/financial_phrasebank/<br>poem_sentiment/anli/quarell/quartz/<br>medical_questions_pairs/paws/dbpedia_14 |
| COLA (cola-sst2)                    | 8551       | 1000      | glue-cola/glue-mnli/glue-qqp/glue-mrpc/<br>glue-qnli/glue-rte/glue-sst2/glue-wnli                                                                                                         |
| DBpedia (dbpedia_14)                | 16384      | 1000      | glue-sst2/glue-mnli/math_qa/sciq/<br>social_i_qa/wino_grande/glue-qqp/<br>ag_news/financial_phrasebank/<br>poem_sentiment/anli/quarell/quartz/<br>medical_questions_pairs/paws/dbpedia_14 |
| EmoC (emo)                          | 16384      | 1000      | glue-sst2/amazon_polarity/<br>financial_phrasebank/poem_sentiment/<br>yelp_polarity/glue-cola/blimp/ag_news/<br>dbpedia_14/ethos/emo/emotion                                              |
| EmoS (emotion)                      | 16000      | 1000      | glue-sst2/amazon_polarity/<br>financial_phrasebank/poem_sentiment/<br>yelp_polarity/glue-cola/blimp/ag_news/<br>dbpedia_14/ethos/emo/emotion                                              |
| ETHOS-SO (ethos-sexual_orientation) | 346        | 87        | glue-sst2/amazon_polarity/<br>financial_phrasebank/poem_sentiment/<br>yelp_polarity/glue-cola/blimp/ag_news/<br>dbpedia_14/ethos/emo/emotion                                              |
| ETHOS-R (ethos-religion)            | 346        | 87        | glue-sst2/amazon_polarity/<br>financial_phrasebank/poem_sentiment/<br>yelp_polarity/glue-cola/blimp/ag_news/<br>dbpedia_14/ethos/emo/emotion                                              |

Table 2: Dataset details

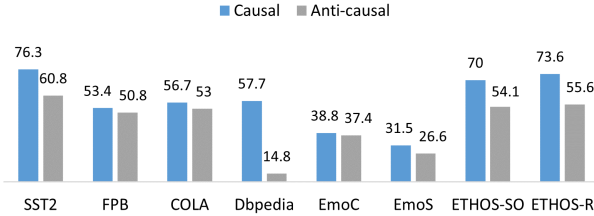

Figure 6: Accuracy of randomly selected demonstrations averaged over seven different LLMs except for GPT3-davinci, using the adopted *causal* direction and the *anti-causal* direction.

552  **$k$ -ablation study results.** The detailed results of  $k$  ablation study are shown in Table 9, corresponding  
553 to Figure 4a in the main text. In this experiment, we do not reorder the selected demonstrations  
554 according to Equation (3), as we need to use GPT2-large for the reordering, and it cannot fit in all the  
555 demonstrations. Instead, we order the selected demonstrations from the largest  $\hat{P}_M^d(\theta^d|X^d, Y^d)$  to  
556 the smallest.

557  **$c$ -ablation study results.** The detailed results of  $c$  ablation study are shown in Table 10, corresponding  
558 to Figure 4b in the main text.

559 **Effect of using ground truth labels.** According to [21], the ground truth label is not necessary  
560 for demonstrations to have a good in-context learning performance, which we found is not entirely  
561 true for all the tasks. We compare our method with the randomly selected demonstration baseline  
562 under three scenarios: (a) **Original:** demonstrations with the correct labels; (b) **Random words:**  
563 using a random label projection map  $\tau^d$  instead of a meaningful one. i.e., map each label to a fixed  
564 random word. In this case, the mapping from the input tokens  $X$  to the labels  $Y$  is still preserved; (c)  
565 **Random labels:** assign a random label to each demonstration, with the original label projection map  
566  $\tau^d$ . As shown in Figure 7, by using a random label projection map or randomly assigning the labels,  
567 the performance of the randomly selected demonstration baseline drops considerably. And randomize  
568 the label assignment gives a larger performance drop than only using a random label projection map,

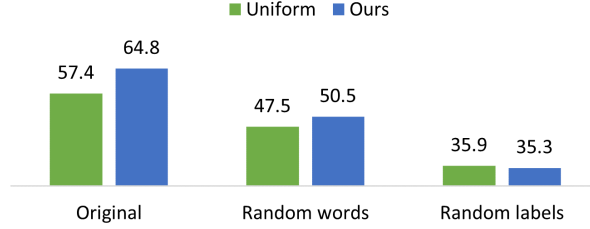

Figure 7: In-context learning accuracy of our method versus random selection baseline, with (a) ground truth labels (*original*), (b) random label mapping (*random words*), or random label assignments (*random label*), averaged over all eight datasets. Numbers are obtained with GPT2-large.

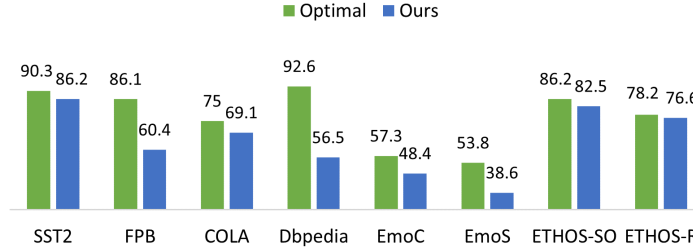

Figure 8: Accuracy of in-context learning using our method versus the theoretical maximum accuracy obtained using the learned concept tokens as prefixes. Numbers are obtained with GPT2-large.

569 which shows that the mapping between  $X$  and  $Y$  in the demonstrations matters. This indicates that  
 570 in-context learning infers the mapping between  $X$  and  $Y$  from the demonstrations instead of merely  
 571 invoking some learned function stored in the LLM parameters based on the appearance of  $X$  and  
 572  $Y$ . We also show that the demonstrations selected by our method represent the  $X - Y$  mapping  
 573 better, as under the **Random words** condition, our method performs better than the random selection  
 574 baseline, while our method does not improve the random selection baseline under the **Random labels**  
 575 condition. The detailed results with random words and random labels are shown in Table 7

576 **Optimal performance** As stated in Theorem 2.3, the optimal performance of an in-context learning  
 577 classifier is the Bayes optimal classifier  $\arg \max_{y \in \mathcal{Y}} P_M^d(Y = y | \theta^d, X)$ , which is approximated by  
 578 using the learned concept tokens as prefixes. Note that this approximated Bayes optimal classifier  
 579 cannot be transferred across different LLMs, as the learned concept tokens embeddings are aligned  
 580 with a specific LLM. The advantage of in-context learning with our method is that the demonstrations  
 581 can be transferred to any LLMs without training. Here we only compare the accuracy of in-context  
 582 learning with our method and the approximated Bayes optimal classifier using GPT2-large, as it is  
 583 the LLM that concept tokens are fine-tuned with. As shown in Figure 8, our method comes close  
 584 to the optimal accuracy on many datasets, while there are some datasets that our method is lagging.  
 585 This indicates that there are two ways to improve our method: the first is to improve the performance  
 586 of the optimal classifier, by introducing a better latent concept learning algorithm. The other way  
 587 is to reduce the performance gap between our method and the optimal classifier, by improving the  
 588 demonstration selection algorithm. The detailed results using the learned concept tokens as prefixes  
 589 are shown in Table 8.

590 **Reordering results.** The detailed results with and without reordering are shown in Table 11,  
 591 corresponding to Figure 9.

592 **Similar tokens.** We show the top ten similar tokens to some learned concept tokens in Table 12, as  
 593 summarized in Figure 5 in the main text.

594 **Likelihood histogram.** We also show histograms of the probability of each example predicting  
 595 corresponding concept tokens in different datasets. We can see that the probability of prediction  
 596 concept tokens can well differentiate examples in a dataset.

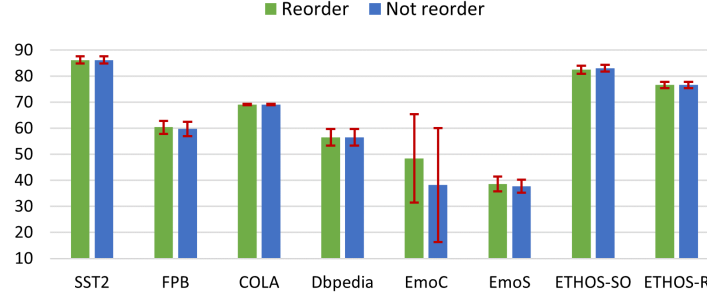

Figure 9: In-context learning accuracy of our method versus random selection baseline, with and without reordering. The red error bars represent the standard deviation across five runs. Numbers are obtained with GPT2-large.

Table 3: Accuracy of selected demonstration. Our demonstrations are selected using GPT2-large, and the same set of demonstrations is applied to all different LLMs. All LLMs are pre-trained only with the language modeling objective, while the pre-training data size of GPT2s is much smaller than GPT3s.

| LLM            | Method      | SST2       | FPB         | COLA       | DBpedia     | EmoC        | EmoS        | ETHOS-SO   | ETHOS-R    | Avg  |
|----------------|-------------|------------|-------------|------------|-------------|-------------|-------------|------------|------------|------|
| GPT2 (124M)    | Uniform     | 69.7 ± 1.8 | 52.9 ± 2.3  | 61.9 ± 1.4 | 48.0 ± 0.7  | 35.3 ± 1.7  | 26.4 ± 1.0  | 64.1 ± 4.8 | 71.0 ± 1.8 | 53.7 |
|                | Similar     | 69.5 ± 0.6 | 55.9 ± 1.7  | 63.2 ± 1.2 | 44.7 ± 3.1  | 36.4 ± 2.0  | 26.6 ± 1.3  | 77.7 ± 2.7 | 80.0 ± 3.7 | 56.8 |
|                | <b>Ours</b> | 76.8 ± 2.9 | 64.5 ± 3.2  | 69.1 ± 0.2 | 53.5 ± 2.95 | 37.2 ± 11.1 | 30.6 ± 4.8  | 80.9 ± 1.9 | 76.8 ± 2.6 | 61.2 |
| GPT2-m (355M)  | Uniform     | 70.8 ± 1.3 | 52.0 ± 1.7  | 57.8 ± 1.3 | 49.3 ± 2.0  | 34.2 ± 1.8  | 34.2 ± 1.8  | 76.3 ± 4.9 | 74.7 ± 2.2 | 56.2 |
|                | Similar     | 75.0 ± 1.9 | 57.7 ± 2.0  | 57.5 ± 2.2 | 47.9 ± 6.0  | 37.2 ± 3.6  | 35.2 ± 1.8  | 86.9 ± 2.9 | 84.6 ± 4.3 | 60.3 |
|                | <b>Ours</b> | 81.2 ± 1.3 | 59.3 ± 4.3  | 69.0 ± 0.2 | 52.9 ± 2.3  | 40.4 ± 21.5 | 37.2 ± 2.4  | 83.7 ± 1.1 | 76.8 ± 1.1 | 62.6 |
| GPT2-l (774M)  | Uniform     | 77.1 ± 1.2 | 51.3 ± 2.4  | 62.7 ± 0.8 | 54.4 ± 0.9  | 38.7 ± 2.1  | 34.5 ± 1.2  | 67.6 ± 4.3 | 72.9 ± 2.8 | 57.4 |
|                | Similar     | 80.7 ± 1.6 | 54.8 ± 3.8  | 50.9 ± 1.4 | 51.1 ± 5.2  | 39.9 ± 2.6  | 35.1 ± 2.1  | 80.9 ± 2.8 | 84.4 ± 2.6 | 59.7 |
|                | <b>Ours</b> | 86.2 ± 1.4 | 60.4 ± 2.5  | 69.1 ± 0.2 | 56.5 ± 3.2  | 48.4 ± 17.0 | 38.6 ± 2.8  | 82.5 ± 1.5 | 76.6 ± 1.2 | 64.8 |
| GPT2-xl (1.5B) | Uniform     | 74.7 ± 0.9 | 53.2 ± 1.9  | 55.8 ± 1.6 | 53.0 ± 1.9  | 38.2 ± 1.5  | 38.2 ± 1.5  | 67.8 ± 6.4 | 72.6 ± 4.1 | 56.7 |
|                | Similar     | 80.6 ± 1.3 | 53.0 ± 2.5  | 55.0 ± 2.5 | 51.6 ± 5.9  | 39.9 ± 2.0  | 32.9 ± 2.1  | 82.8 ± 2.2 | 83.9 ± 4.5 | 60   |
|                | <b>Ours</b> | 83.1 ± 3.6 | 62.0 ± 2.5  | 68.9 ± 0.2 | 58.6 ± 3.3  | 43.6 ± 16.4 | 43.6 ± 16.4 | 83.0 ± 1.3 | 77.9 ± 1.3 | 65.1 |
| GPT3-a (350M)  | Uniform     | 76.9 ± 0.7 | 56.6 ± 1.1  | 53.1 ± 1.8 | 62.1 ± 1.4  | 38.6 ± 1.4  | 27.7 ± 1.3  | 65.5 ± 5.7 | 74.0 ± 3.0 | 56.8 |
|                | Similar     | 78.7 ± 1.0 | 52.2 ± 2.7  | 53.1 ± 1.8 | 54.6 ± 1.7  | 42.4 ± 3.5  | 37.2 ± 1.1  | 84.1 ± 2.2 | 87.8 ± 3.5 | 61.3 |
|                | <b>Ours</b> | 85.4 ± 1.7 | 61.9 ± 10.5 | 58.2 ± 7.0 | 64.0 ± 4.4  | 43.0 ± 7.2  | 37.9 ± 2.3  | 84.4 ± 1.4 | 78.9 ± 0.9 | 64.2 |
| GPT3-b (1.3B)  | Uniform     | 80.8 ± 0.6 | 55.2 ± 3.3  | 46.8 ± 2.0 | 66.5 ± 1.4  | 42.0 ± 0.7  | 27.0 ± 1.2  | 71.0 ± 4.6 | 72.6 ± 3.1 | 57.7 |
|                | Similar     | 83.9 ± 1.3 | 56.2 ± 2.3  | 45.1 ± 1.8 | 59.8 ± 1.8  | 42.9 ± 3.5  | 38.1 ± 1.7  | 86.7 ± 3.0 | 86.4 ± 3.0 | 62.4 |
|                | <b>Ours</b> | 87.3 ± 2.0 | 64.3 ± 5.9  | 67.2 ± 0.9 | 70.2 ± 3.2  | 43.6 ± 13.0 | 38.9 ± 5.0  | 84.6 ± 0.9 | 78.9 ± 1.2 | 66.9 |
| GPT3-c (6.7B)  | Uniform     | 84.2 ± 1.4 | 52.6 ± 1.8  | 59.1 ± 1.5 | 70.6 ± 0.8  | 44.3 ± 2.5  | 32.3 ± 1.9  | 77.5 ± 4.7 | 77.5 ± 0.6 | 62.3 |
|                | Similar     | 85.7 ± 1.4 | 62.2 ± 0.9  | 58.0 ± 1.7 | 62.2 ± 2.0  | 47.4 ± 4.3  | 39.8 ± 1.7  | 89.2 ± 1.4 | 89.7 ± 1.9 | 66.8 |
|                | <b>Ours</b> | 88.8 ± 0.7 | 64.1 ± 5.7  | 69.0 ± 0.3 | 73.6 ± 2.9  | 50.3 ± 11.9 | 43.1 ± 4.6  | 86.2 ± 0.0 | 78.2 ± 0.0 | 69.2 |
| GPT3-d (175B)  | Uniform     | 86.5 ± 0.9 | 59.2 ± 2.4  | 45.5 ± 2.8 | 73.6 ± 1.9  | 39.4 ± 0.7  | 40.6 ± 1.7  | 77.2 ± 2.6 | 76.8 ± 3.5 | 62.4 |
|                | Similar     | 88.5 ± 0.8 | 55.4 ± 3.3  | 45.4 ± 1.5 | 67.2 ± 1.8  | 37.6 ± 1.6  | 39.8 ± 1.4  | 86.9 ± 2.4 | 89.0 ± 3.8 | 63.7 |
|                | <b>Ours</b> | 87.8 ± 3.4 | 62.7 ± 3.3  | 58.5 ± 8.2 | 75.5 ± 2.4  | 41.3 ± 3.6  | 42.7 ± 3.9  | 85.1 ± 0.0 | 79.3 ± 0.0 | 66.6 |
| Avg            | Uniform     | 77.6       | 54.1        | 55.3       | 59.7        | 38.8        | 32.6        | 70.9       | 74.0       | 57.9 |
|                | Similar     | 80.3       | 55.9        | 53.5       | 54.9        | 40.5        | 35.6        | 84.4       | 85.7       | 61.4 |
|                | <b>Ours</b> | 84.6       | 62.4        | 66.1       | 63.1        | 43.5        | 39.1        | 83.8       | 77.9       | 65.0 |

## C Limitations and Future Work

While the assumption that a large language model captures the true distribution of language is fairly common in the literature studying LLMs [44, 29], this assumption is not entirely accurate in practice. According to [12], LLMs systematically underestimate rare text sequences, which constitute a significant portion of the long-tail distribution of language. Although this assumption is adequate to achieve favorable empirical results, it is expected that more accurate language models will, in theory, lead to improved outcomes.

The selection of the accompanying diverse tasks  $\mathcal{S}$  is currently left to the user’s discretion. A better approach to constructing such a task set is needed to gain a deeper understanding of latent concept variables and to improve the latent concept learning algorithm.

Our algorithm currently only applies to classification tasks. More complex latent variables could be designed to improve the in-context learning performance of more complex tasks like math word questions and logical reasoning problems.

Table 4: Accuracy of selected demonstration. Our demonstrations are selected using GPT2-large, and the same set of demonstrations is applied to all different LLMs. All LLMs are pre-trained only with the language modeling objective, while the pre-training data size of GPT2s is much smaller than GPT3s.

| LLM              | Method      | SST2           | FPB            | COLA           | DBpedia         | EmoC            | EmoS           | ETHOS-SO        | ETHOS-R         | Avg  |
|------------------|-------------|----------------|----------------|----------------|-----------------|-----------------|----------------|-----------------|-----------------|------|
| GPT2<br>(124M)   | Uniform     | 69.7 $\pm$ 1.8 | 52.9 $\pm$ 2.3 | 61.9 $\pm$ 1.4 | 48.0 $\pm$ 0.7  | 35.3 $\pm$ 1.7  | 26.4 $\pm$ 1.0 | 64.1 $\pm$ 4.8  | 71.0 $\pm$ 1.8  | 53.7 |
|                  | Random      | 69.8 $\pm$ 3.3 | 51.1 $\pm$ 1.7 | 69.0 $\pm$ 0.1 | 49.0 $\pm$ 4.5  | 33.7 $\pm$ 15.5 | 24.2 $\pm$ 7.6 | 66.4 $\pm$ 17.5 | 66.2 $\pm$ 16.2 | 53.7 |
|                  | <b>Ours</b> | 76.8 $\pm$ 2.9 | 64.5 $\pm$ 3.2 | 69.1 $\pm$ 0.2 | 53.5 $\pm$ 2.95 | 37.2 $\pm$ 11.1 | 30.6 $\pm$ 4.8 | 80.9 $\pm$ 1.9  | 76.8 $\pm$ 2.6  | 61.2 |
| GPT2-l<br>(774M) | Uniform     | 77.1 $\pm$ 1.2 | 51.3 $\pm$ 2.4 | 62.7 $\pm$ 0.8 | 54.4 $\pm$ 0.9  | 38.7 $\pm$ 2.1  | 34.5 $\pm$ 1.2 | 67.6 $\pm$ 4.3  | 72.9 $\pm$ 2.8  | 57.4 |
|                  | Random      | 81.9 $\pm$ 4.5 | 46.5 $\pm$ 4.7 | 64.9 $\pm$ 7.8 | 50.3 $\pm$ 4.3  | 42.5 $\pm$ 16.7 | 36.1 $\pm$ 6.5 | 67.6 $\pm$ 20.4 | 67.8 $\pm$ 15.0 | 57.2 |
|                  | <b>Ours</b> | 86.2 $\pm$ 1.4 | 60.4 $\pm$ 2.5 | 69.1 $\pm$ 0.2 | 56.5 $\pm$ 3.2  | 48.4 $\pm$ 17.0 | 38.6 $\pm$ 2.8 | 82.5 $\pm$ 1.5  | 76.6 $\pm$ 1.2  | 64.8 |

Table 5: We test our method on other similar sizes (6-7B) LLMs.

| LLM    | Method      | SST2           | FPB            | COLA           | DBpedia        | EmoC            | EmoS           | ETHOS-SO        | ETHOS-R         | Avg  |
|--------|-------------|----------------|----------------|----------------|----------------|-----------------|----------------|-----------------|-----------------|------|
| GPT2-l | Random      | 77.1 $\pm$ 1.2 | 51.3 $\pm$ 2.4 | 62.7 $\pm$ 0.8 | 54.4 $\pm$ 0.9 | 38.7 $\pm$ 2.1  | 34.5 $\pm$ 1.2 | 67.6 $\pm$ 4.3  | 72.9 $\pm$ 2.8  | 57.4 |
|        | <b>Ours</b> | 86.2 $\pm$ 1.4 | 60.4 $\pm$ 2.5 | 69.1 $\pm$ 0.2 | 56.5 $\pm$ 3.2 | 48.4 $\pm$ 17.0 | 38.6 $\pm$ 2.8 | 82.5 $\pm$ 1.5  | 76.6 $\pm$ 1.2  | 64.8 |
| GPT3-c | Random      | 84.2 $\pm$ 1.4 | 52.6 $\pm$ 1.8 | 59.1 $\pm$ 1.5 | 70.6 $\pm$ 0.8 | 44.3 $\pm$ 2.5  | 32.3 $\pm$ 1.9 | 77.5 $\pm$ 4.7  | 77.5 $\pm$ 0.6  | 62.3 |
|        | <b>Ours</b> | 88.8 $\pm$ 0.7 | 64.1 $\pm$ 5.7 | 69.0 $\pm$ 0.3 | 73.6 $\pm$ 2.9 | 50.3 $\pm$ 11.9 | 43.1 $\pm$ 4.6 | 86.2 $\pm$ 0.0  | 78.2 $\pm$ 0.0  | 69.2 |
| GPT-J  | Random      | 78.5 $\pm$ 1.0 | 53.1 $\pm$ 1.7 | 58.3 $\pm$ 2.2 | 55.6 $\pm$ 1.2 | 38.5 $\pm$ 2.0  | 33.3 $\pm$ 1.5 | 76.6 $\pm$ 3.7  | 76.6 $\pm$ 1.4  | 58.8 |
|        | <b>Ours</b> | 87.8 $\pm$ 1.9 | 56.7 $\pm$ 4.3 | 69.1 $\pm$ 0.2 | 60.0 $\pm$ 3.6 | 32.5 $\pm$ 16.1 | 33.2 $\pm$ 2.8 | 85.3 $\pm$ 0.5  | 77.0 $\pm$ 0.0  | 62.7 |
| OPT    | Random      | 72.4 $\pm$ 0.8 | 32.8 $\pm$ 0.3 | 34.8 $\pm$ 0.6 | 29.4 $\pm$ 1.4 | 67.1 $\pm$ 1.8  | 36.9 $\pm$ 0.6 | 86.2 $\pm$ 0.0  | 78.2 $\pm$ 0.0  | 54.7 |
|        | <b>Ours</b> | 74.2 $\pm$ 3.0 | 34.1 $\pm$ 6.1 | 35.7 $\pm$ 3.1 | 28.8 $\pm$ 2.1 | 76.7 $\pm$ 4.1  | 39.0 $\pm$ 3.4 | 86.2 $\pm$ 0.0  | 78.2 $\pm$ 0.0  | 56.6 |
| LLaMA  | Random      | 57.7 $\pm$ 1.5 | 23.7 $\pm$ 1.3 | 30.8 $\pm$ 0.2 | 15.8 $\pm$ 0.8 | 4.4 $\pm$ 0.7   | 35.2 $\pm$ 0.7 | 66.2 $\pm$ 5.8  | 57.2 $\pm$ 5.1  | 36.4 |
|        | <b>Ours</b> | 60.5 $\pm$ 4.7 | 19.1 $\pm$ 1.9 | 30.8 $\pm$ 0.2 | 16.9 $\pm$ 1.3 | 4.3 $\pm$ 0.7   | 35.3 $\pm$ 0.6 | 77.2 $\pm$ 13.6 | 56.3 $\pm$ 10.8 | 37.6 |

## D Broader Impact

The utilization of language models (LLMs) for specific tasks is often hindered by the high cost associated with training or fine-tuning them. However, the in-context learning paradigm offers a cost-effective and convenient alternative for utilizing the power of pre-trained LLMs. Our work has demonstrated a significant improvement in the performance of in-context learning through a relatively low-cost and simple approach, thus making the use of LLMs more accessible for individuals with limited resources.

However, it is important to consider the broader implications of the increasing use of LLMs. As LLMs are not infallible and may make mistakes, it is crucial to explicitly warn users of the potential for misleading output and to regulate the distribution of LLMs in order to prevent any negative societal impact. Additionally, it is possible that LLMs could be intentionally misused, thus it is important to consider the ethical implications of their use and to take appropriate measures to mitigate any potential negative effects. We posit that these regulations and measures should be put in place at the time of distributing LLMs to ensure the safe and responsible use of these models. Furthermore, as we publicly release our code, we will also provide clear warnings and guidelines to users to ensure that the potential risks associated with the use of our method are fully understood and addressed.

Table 6: We test random selection baseline with anti-causal direction.

| LLM     | SST2           | FPB            | COLA           | DBpedia        | EmoC           | EmoS           | ETHOS-SO       | ETHOS-R        |
|---------|----------------|----------------|----------------|----------------|----------------|----------------|----------------|----------------|
| GPT2    | 57.4 $\pm$ 1.9 | 56.6 $\pm$ 2.1 | 55.9 $\pm$ 1.7 | 11.3 $\pm$ 1.0 | 24.6 $\pm$ 2.4 | 22.1 $\pm$ 1.1 | 64.1 $\pm$ 4.8 | 58.6 $\pm$ 5.5 |
| GPT2-m  | 56.7 $\pm$ 1.6 | 48.7 $\pm$ 2.1 | 55.3 $\pm$ 1.8 | 13.9 $\pm$ 1.2 | 22.4 $\pm$ 1.9 | 24.9 $\pm$ 2.3 | 44.8 $\pm$ 1.9 | 45.5 $\pm$ 3.5 |
| GPT2-l  | 58.7 $\pm$ 0.7 | 33.7 $\pm$ 1.3 | 50.8 $\pm$ 1.6 | 13.6 $\pm$ 1.3 | 28.2 $\pm$ 3.6 | 26.2 $\pm$ 2.7 | 48.7 $\pm$ 3.7 | 53.6 $\pm$ 5.3 |
| GPT2-xl | 54.2 $\pm$ 0.5 | 46.8 $\pm$ 1.2 | 50.6 $\pm$ 1.1 | 12.6 $\pm$ 1.5 | 31.4 $\pm$ 2.8 | 25.9 $\pm$ 3.2 | 65.5 $\pm$ 4.9 | 61.8 $\pm$ 1.5 |
| GPT3-a  | 55.8 $\pm$ 0.9 | 58.9 $\pm$ 2.1 | 51.6 $\pm$ 1.4 | 14.3 $\pm$ 0.8 | 54.2 $\pm$ 3.1 | 27.7 $\pm$ 1.3 | 49.2 $\pm$ 3.3 | 54.9 $\pm$ 6.4 |
| GPT3-b  | 64.4 $\pm$ 1.6 | 58.9 $\pm$ 2.6 | 53.4 $\pm$ 1.1 | 14.6 $\pm$ 1.1 | 52.0 $\pm$ 2.5 | 27.0 $\pm$ 1.3 | 48.3 $\pm$ 2.7 | 51.0 $\pm$ 4.0 |
| GPT3-c  | 78.2 $\pm$ 1.6 | 52.3 $\pm$ 2.3 | 53.7 $\pm$ 0.7 | 23.0 $\pm$ 2.5 | 49.1 $\pm$ 2.6 | 32.2 $\pm$ 1.9 | 57.9 $\pm$ 2.7 | 64.1 $\pm$ 5.0 |
| Avg     | 60.8           | 50.8           | 53             | 14.8           | 37.4           | 26.6           | 54.1           | 55.6           |

Table 7: We test our method with random words and random labels using GPT2-large.

|          | Method      | SST2           | FPB            | COLA           | DBpedia        | EmoC            | EmoS           | ETHOS-SO       | ETHOS-R        | Avg  |
|----------|-------------|----------------|----------------|----------------|----------------|-----------------|----------------|----------------|----------------|------|
| R words  | Random      | 54.1 $\pm$ 4.2 | 43.4 $\pm$ 1.9 | 62.2 $\pm$ 4.9 | 11.2 $\pm$ 0.9 | 32.4 $\pm$ 5.2  | 19.1 $\pm$ 1.8 | 80.7 $\pm$ 4.8 | 77.0 $\pm$ 3.6 | 47.5 |
|          | <b>Ours</b> | 50.3 $\pm$ 1.3 | 44.9 $\pm$ 4.2 | 69.2 $\pm$ 0.2 | 13.9 $\pm$ 1.2 | 37.8 $\pm$ 12.1 | 23.5 $\pm$ 7.4 | 86.0 $\pm$ 0.5 | 77.9 $\pm$ 0.5 | 50.5 |
| R labels | Random      | 51.5 $\pm$ 0.9 | 32.5 $\pm$ 1.2 | 49.3 $\pm$ 3.0 | 6.7 $\pm$ 1.0  | 25.1 $\pm$ 0.6  | 17.2 $\pm$ 0.9 | 48.0 $\pm$ 2.5 | 56.8 $\pm$ 3.1 | 35.9 |
|          | <b>Ours</b> | 49.6 $\pm$ 0.9 | 36.2 $\pm$ 2.5 | 49.3 $\pm$ 1.6 | 6.6 $\pm$ 0.2  | 24.7 $\pm$ 0.6  | 16.6 $\pm$ 1.0 | 51.0 $\pm$ 4.9 | 48.7 $\pm$ 3.5 | 35.3 |

Table 8: Accuracy using concept tokens as prefixes.

| SST2           | FPB            | COLA           | DBpedia        | EmoC           | EmoS           | ETHOS-SO       | ETHOS-R        |
|----------------|----------------|----------------|----------------|----------------|----------------|----------------|----------------|
| 90.3 $\pm$ 0.0 | 86.1 $\pm$ 0.0 | 75.0 $\pm$ 0.1 | 92.6 $\pm$ 0.6 | 57.3 $\pm$ 1.8 | 53.8 $\pm$ 0.7 | 86.2 $\pm$ 0.0 | 78.2 $\pm$ 0.0 |

Table 9:  $k$  ablation study using GPT2-large, without reordering.

|          | Method      | SST2           | FPB            | COLA           | DBpedia        | EmoC            | EmoS           | ETHOS-SO        | ETHOS-R        | Avg  |
|----------|-------------|----------------|----------------|----------------|----------------|-----------------|----------------|-----------------|----------------|------|
| $k = 2$  | Random      | 74.4 $\pm$ 1.0 | 48.5 $\pm$ 1.1 | 48.9 $\pm$ 1.6 | 52.9 $\pm$ 2.0 | 42.8 $\pm$ 0.6  | 37.1 $\pm$ 1.2 | 66.9 $\pm$ 4.7  | 66.4 $\pm$ 6.8 | 54.7 |
|          | <b>Ours</b> | 78.1 $\pm$ 4.5 | 50.1 $\pm$ 2.9 | 54.3 $\pm$ 8.8 | 57.3 $\pm$ 5.1 | 41.1 $\pm$ 9.8  | 36.1 $\pm$ 2.6 | 84.6 $\pm$ 1.6  | 76.8 $\pm$ 4.5 | 59.8 |
| $k = 4$  | Random      | 76.9 $\pm$ 0.7 | 56.6 $\pm$ 1.1 | 53.1 $\pm$ 1.8 | 62.1 $\pm$ 1.4 | 38.6 $\pm$ 1.4  | 27.7 $\pm$ 1.3 | 65.5 $\pm$ 5.7  | 74.0 $\pm$ 3.0 | 56.8 |
|          | <b>Ours</b> | 86.2 $\pm$ 1.4 | 59.7 $\pm$ 2.8 | 69.1 $\pm$ 0.2 | 56.5 $\pm$ 3.2 | 38.2 $\pm$ 21.8 | 37.7 $\pm$ 2.5 | 83.0 $\pm$ 1.3  | 76.6 $\pm$ 1.2 | 63.4 |
| $k = 8$  | Random      | 79.9 $\pm$ 0.2 | 57.1 $\pm$ 1.6 | 51.3 $\pm$ 1.0 | 66.5 $\pm$ 1.2 | 37.6 $\pm$ 1.5  | 36.2 $\pm$ 0.6 | 68.5 $\pm$ 3.5  | 72.9 $\pm$ 3.3 | 58.8 |
|          | <b>Ours</b> | 87.0 $\pm$ 2.4 | 59.9 $\pm$ 3.3 | 55.3 $\pm$ 9.7 | 67.0 $\pm$ 0.9 | 39.9 $\pm$ 5.3  | 38.8 $\pm$ 2.6 | 77.0 $\pm$ 11.1 | 78.9 $\pm$ 0.9 | 63   |
| $k = 16$ | Random      | 79.9 $\pm$ 1.1 | 54.9 $\pm$ 2.7 | 54.5 $\pm$ 2.8 | 69.1 $\pm$ 1.1 | 33.7 $\pm$ 2.2  | 33.5 $\pm$ 1.4 | 64.8 $\pm$ 4.0  | 69.0 $\pm$ 3.2 | 57.4 |
|          | <b>Ours</b> | 84.6 $\pm$ 1.9 | 60.4 $\pm$ 6.4 | 62.0 $\pm$ 7.0 | 71.0 $\pm$ 1.9 | 37.2 $\pm$ 6.1  | 37.1 $\pm$ 2.2 | 72.4 $\pm$ 7.6  | 74.7 $\pm$ 4.7 | 62.4 |

Table 10:  $c$  ablation study using GPT2-large

|          | SST2           | FPB             | COLA           | DBpedia        | EmoC            | EmoS           | ETHOS-SO       | ETHOS-R         | Avg   |
|----------|----------------|-----------------|----------------|----------------|-----------------|----------------|----------------|-----------------|-------|
| $c = 5$  | 78.9 $\pm$ 2.4 | 59.8 $\pm$ 10.8 | 34.3 $\pm$ 5.0 | 62.9 $\pm$ 2.4 | 44.9 $\pm$ 9.5  | 38.1 $\pm$ 2.4 | 71.7 $\pm$ 5.9 | 62.1 $\pm$ 19.7 | 56.6  |
| $c = 10$ | 85.4 $\pm$ 1.7 | 61.9 $\pm$ 10.5 | 58.2 $\pm$ 7.0 | 64.0 $\pm$ 4.4 | 43.0 $\pm$ 7.2  | 37.9 $\pm$ 2.3 | 84.4 $\pm$ 1.4 | 78.9 $\pm$ 0.9  | 64.2  |
| $c = 15$ | 80.1 $\pm$ 1.4 | 64.3 $\pm$ 7.7  | 63.1 $\pm$ 9.4 | 58.7 $\pm$ 3.2 | 36.4 $\pm$ 11.5 | 38.6 $\pm$ 1.9 | 80.9 $\pm$ 3.9 | 76.3 $\pm$ 5.9  | 62.3  |
| $c = 20$ | 78.5 $\pm$ 4.1 | 51.8 $\pm$ 8.0  | 66.5 $\pm$ 2.3 | 58.0 $\pm$ 3.4 | 36.3 $\pm$ 4.3  | 41.8 $\pm$ 5.8 | 80.7 $\pm$ 4.5 | 73.8 $\pm$ 5.4  | 60.92 |

Table 11: Reorder versus not reorder using our method, with GPT2-large.

|             | SST2           | FPB            | COLA           | DBpedia        | EmoC            | EmoS           | ETHOS-SO       | ETHOS-R        | Avg  |
|-------------|----------------|----------------|----------------|----------------|-----------------|----------------|----------------|----------------|------|
| reorder     | 86.2 $\pm$ 1.4 | 60.4 $\pm$ 2.5 | 69.1 $\pm$ 0.2 | 56.5 $\pm$ 3.2 | 48.4 $\pm$ 17.0 | 38.6 $\pm$ 2.8 | 82.5 $\pm$ 1.5 | 76.6 $\pm$ 1.2 | 64.8 |
| not reorder | 86.2 $\pm$ 1.4 | 59.7 $\pm$ 2.8 | 69.1 $\pm$ 0.2 | 56.5 $\pm$ 3.2 | 38.2 $\pm$ 21.8 | 37.7 $\pm$ 2.5 | 83.0 $\pm$ 1.3 | 76.6 $\pm$ 1.2 | 63.4 |



Table 12: We list the top 10 similar words (tokens) to some of the learned concept tokens.

| concept token | similar words                                                                                                    |
|---------------|------------------------------------------------------------------------------------------------------------------|
| FPB-2         | milo coordinate notify rendering benefiting routing EntityItem routed Messages Plot                              |
| FPB-3         | unlocked updating deleting dropping damage updates drops Gained taken dropped                                    |
| FPB-4         | FX Safari Fixes advertisers Links Coins Operator marketers Guidelines                                            |
| FPB-5         | 674 592 693 696 498 593 793 504 691 683                                                                          |
| COLA-1        | exha trunc curv fragmented elong iterator initialized bounds Iter filament                                       |
| COLA-2        | Sp spa contributed cerv borrower paper tiger Erica USH Schwartz                                                  |
| COLA-7        | democr Barack WH ophobic neum Democrats Rachel WH Democrats                                                      |
| DBpedia-4     | often impede blockade incarcerated LEASE pollutants pesticides uphe lawmakers fossils                            |
| DBpedia-5     | categorized closes therapies antidepressant retrospective clinically physicians therapists randomized clinicians |
| DBpedia-7     | JS provided Killed richness Compet Nevertheless Probably Proceedings horizontally                                |
| ETHOS-SO-3    | Revolution Spread itu Million Pascal stabil Indy Georgian Figure resy                                            |
| ETHOS-R-2     | council Chocobo Shant uyomi additional cumbers subur ThumbnailImage araoh Pharaoh                                |
| ETHOS-R-8     | seems outlines emitted grin outline circuitry sized flips emits flipped                                          |
| ETHOS-R-9     | 223 asel Cyrus Sith Scorpion Snape Jas Leia Ned Morty                                                            |
| EmoC-6        | behavi checkpoints unintention crib eleph looph np mosquit blat pione                                            |
| EmoC-8        | depressed bullied choked stricken devastated unsuccessful cheated distraught troubled failing                    |
| EmoS-1        | frightened rebellious depressed careless bullied restless reluctant distraught clumsy disgruntled                |
| EmoS-5        | obsessive crappy demonic delusions psychosis psychotic childish stupidity reckless insanity                      |
| EmoS-7        | benevolent charismatic perfected volunte unintention pione innocuous fearless glamorous ruthless                 |
| EmoS-9        | whispers pundits Sadly horribly curiously noticeably Sadly gaping painfully shockingly                           |

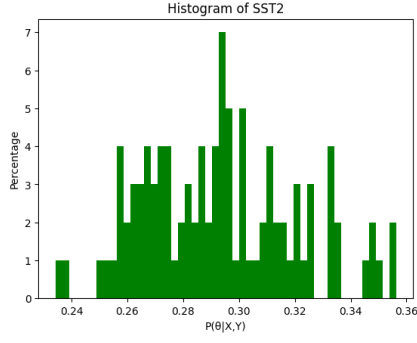

(a) SST2

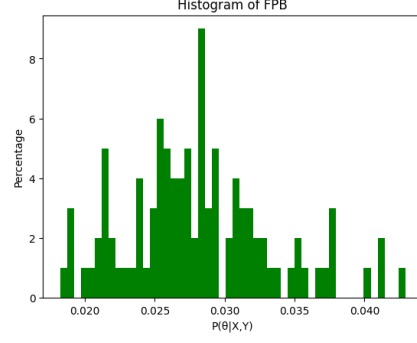

(b) FBP

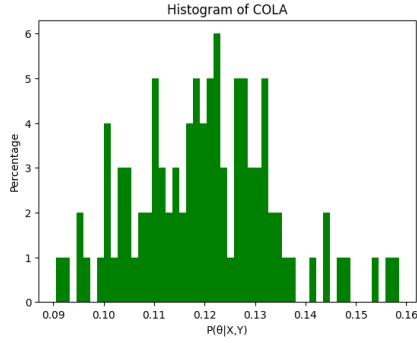

(c) COLA

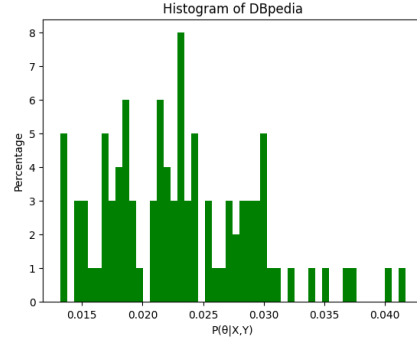

(d) DBpedia

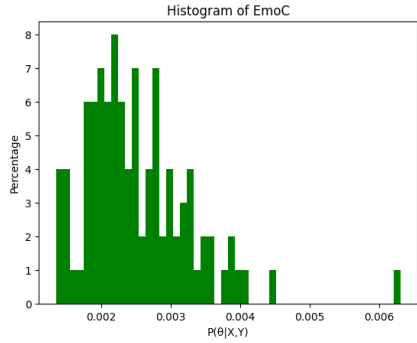

(e) EmoC

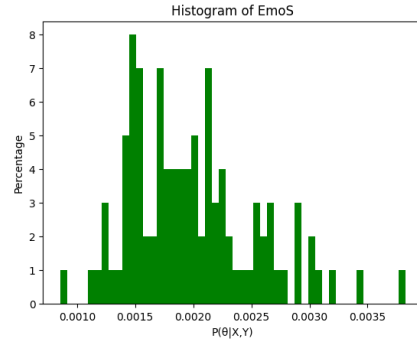

(f) EmoS

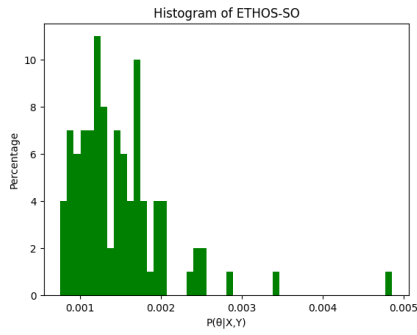

(g) ETHOS-SO

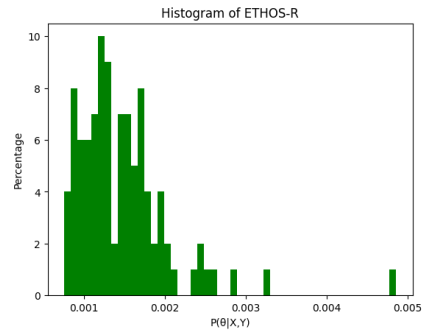

(h) RTHOS-R

Figure 10: Histograms of the probability of train examples in each dataset predicting corresponding concept tokens.
